# Supplementary material
Source: PubMed Central journal article supplement (PMC10513105)
Supplement: NIHMS1929798-supplement-Supplement_2.pdf [file NIHMS1929798-supplement-Supplement_2.pdf]

## **Instructions for Clean Catch Urine Collection**

### **Males**

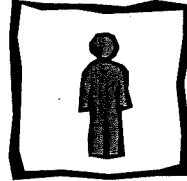

1. Wash hands thoroughly with soap and water.
2. Use the antiseptic towelette to clean the end of the penis.
3. Void (urinate) the first part of the urine into the toilet, then catch a portion midstream in the container. Void last part into toilet.
4. Throw antiseptic towelette in the waste basket and placed capped urine specimen into the rotating window in the wall. Make sure the container is labeled with your name and medical record number.

### **Females**

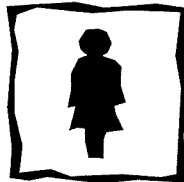

1. Wash hands thoroughly with soap and water.
2. Separate the skin fold around the urinary opening and keep separated during the procedure.
3. With the antiseptic towelette, cleanse each side of the urinary opening 3 times, wiping front to back.
4. Holding the skin folds apart, with one hand, void the first part into the toilet. Catch the midstream urine into the container, void last part in the toilet.
5. Throw antiseptic towelette in the waste basket and placed capped urine specimen into the rotating window on the wall. Make sure the container is labeled with your name and medical record number.
